# Supplementary material for: A mutation-independent CRISPR-Cas9–mediated gene targeting approach to treat a murine model of ornithine transcarbamylase deficiency
Source: PubMed Central journal article supplement (PMC7015695; doi:10.1126/sciadv.aax5701), 2020-02-12
Supplement: aax5701_SM.pdf [file aax5701_SM.pdf]

## Supplementary Materials for

### **A mutation-independent CRISPR-Cas9–mediated gene targeting approach to treat a murine model of ornithine transcarbamylase deficiency**

Lili Wang, Yang Yang, Camilo Ayala Breton, Peter Bell, Mingyao Li, Jia Zhang, Yan Che, Alexei Saveliev, Zhenning He, John White, Caitlin Latshaw, Chenyu Xu, Deirdre McMenamin, Hongwei Yu, Hiroki Morizono, Mark L. Batshaw, James M. Wilson\*

\*Corresponding author. Email: wilsonjm@upenn.edu

Published 12 February 2020, *Sci. Adv.* **6**, eaax5701 (2020)  
DOI: 10.1126/sciadv.aax5701

#### **This PDF file includes:**

Fig. S1. Schematic diagrams of the OTC locus and the targeted OTC locus by HDR or by NHEJ are shown.

Fig. S2. Gene targeting efficiency analysis by ligation-mediated PCR coupled with unique molecular indices (LMU-PCR).

Table S1. PCR primer sequences for on-target indel analysis and LMU-PCR.

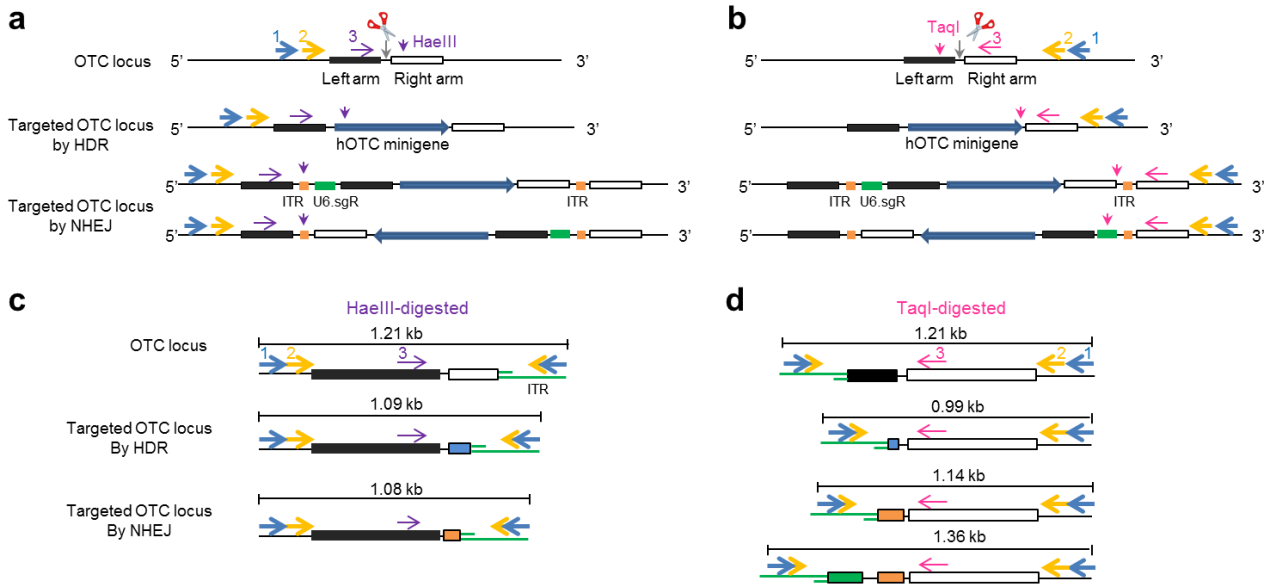

**Fig. S1. Schematic diagrams of the OTC locus and the targeted OTC locus by HDR or by NHEJ are shown.** Genomic DNA was subjected for restriction enzyme digestion with HaeIII or TaqI followed by ligation with the linkers containing unique molecular indices. The first two nested PCR reactions were performed using primer pairs hybridizing to the mOTC locus outside the homology arms and the linkers. The third PCR reaction was performed using primer pairs hybridizing to one of the homology arms and the linkers and subjected for deep sequencing. **a)** Diagrams of the OTC locus indicated with the closest HaeIII sites downstream of primer 3. **b)** Diagrams of the OTC locus indicated with the closest TaqI sites upstream of primer 3. **c, d)** Lengths of the first PCR amplicons on HaeIII-digested (**c**) or TaqI-digested (**d**) genomic DNA for untargeted and targeted mOTC locus are indicated. The HDR-mediated gene targeting efficiency was determined by the percentage of reads containing the expected hOTCco minigene sequence among the total mapped reads.

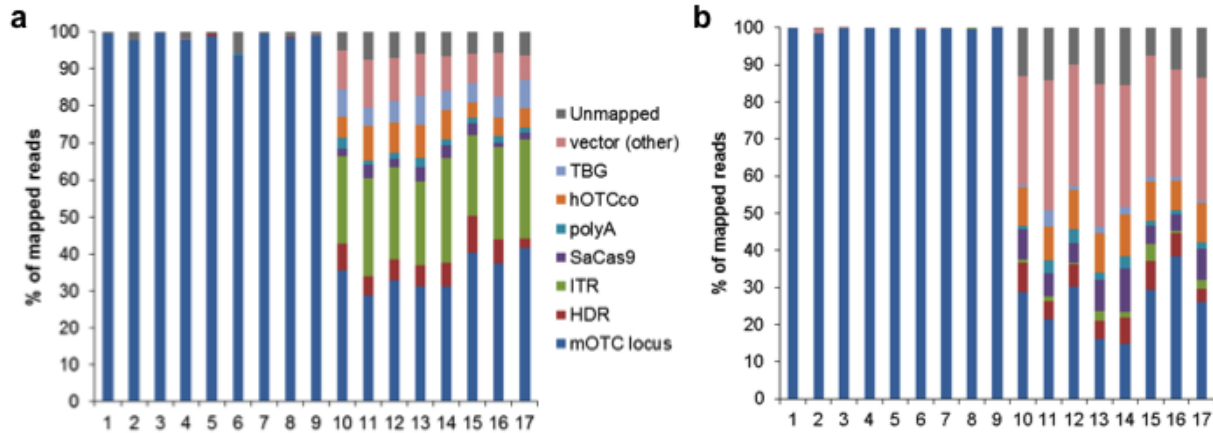

**Fig. S2. Gene targeting efficiency analysis by ligation-mediated PCR coupled with unique molecular indices (LMU-PCR).** Liver DNA were isolated from *spf<sup>flsh</sup>* mice eight weeks post neonatal treatment with the dual gene targeting vectors (#10-17) or untargeted vectors (#2-9). DNA from an untreated *spf<sup>flsh</sup>* mouse served as control (#1). **a, b)** All samples were digested with HaeIII (a) or TaqαI (b), followed by LMU-PCR and deep sequencing. Mapped unique reads were categorized to the mOTC locus, and reads with insertions at the cleavage site were further categorized based on their alignment with the vector sequences to HDR, ITR, SaCas9 cDNA, polyA, and hOTCco cDNA, the TBG promoter, and other parts of vector. Unmapped reads containing inserted DNA sequence could not be aligned to the above segments.

**Table S1. PCR primer sequences for on-target indel analysis and LMU-PCR.**

| <b>Primer</b> | <b>Sequence 5' to 3'</b>                                            |
|---------------|---------------------------------------------------------------------|
| OTC_PointM_F  | GGCTATGCTTGGGAATGTCT                                                |
| OTC_PointM_R  | GCTACAGAATGAAAGAGAGGCG                                              |
| Left-OTC-F1   | GAGTTTAACTGTGGCTTGAGG                                               |
| Left-OTC-F2   | CGGAGTCCTATGTGTCTAGTTC                                              |
| Left-OTC-F3   | CCTCTCTATGGGCAGTCGGTGATAGTCTCACAGACACCGCTC                          |
| Right-OTC-F1  | TTAGTGTCCAATAAGTGTTAGCTGT                                           |
| Right-OTC-F2  | ACAGATGAGCTTTGACTTACTGAAC                                           |
| Right-OTC-F3  | CCTCTCTATGGGCAGTCGGTGATCCATTATCTAAGGAGAAGCATCATC                    |
| P5_1          | AATGATACGGCGACCACCGAGATCTA                                          |
| P5_2          | AATGATACGGCGACCACCGAGATCTACAC                                       |
| p701          | CAAGCAGAAGACGGCATAACGAGATTCGCCTTAGTGACTGGAGTCCTCTCTATGGGCAGTCGGTGA  |
| p702          | CAAGCAGAAGACGGCATAACGAGATCTAGTACCGTGACTGGAGTCCTCTCTATGGGCAGTCGGTGA  |
| p703          | CAAGCAGAAGACGGCATAACGAGATTTCTGCCTGTGACTGGAGTCCTCTCTATGGGCAGTCGGTGA  |
| p704          | CAAGCAGAAGACGGCATAACGAGATGCTCAGGAGTGACTGGAGTCCTCTCTATGGGCAGTCGGTGA  |
| p705          | CAAGCAGAAGACGGCATAACGAGATAGGAGTCCGTGACTGGAGTCCTCTCTATGGGCAGTCGGTGA  |
| p706          | CAAGCAGAAGACGGCATAACGAGATCATGCCTAGTGACTGGAGTCCTCTCTATGGGCAGTCGGTGA  |
| p707          | CAAGCAGAAGACGGCATAACGAGATGTAGAGAGTGACTGGAGTCCTCTCTATGGGCAGTCGGTGA   |
| p708          | CAAGCAGAAGACGGCATAACGAGATCCTCTCTGTGACTGGAGTCCTCTCTATGGGCAGTCGGTGA   |
| p709          | CAAGCAGAAGACGGCATAACGAGATTTACCGACGTGACTGGAGTCCTCTCTATGGGCAGTCGGTGA  |
| p710          | CAAGCAGAAGACGGCATAACGAGATAGTGACCTGTGACTGGAGTCCTCTCTATGGGCAGTCGGTGA  |
| p711          | CAAGCAGAAGACGGCATAACGAGATTCGGATTCGTGACTGGAGTCCTCTCTATGGGCAGTCGGTGA  |
| p712          | CAAGCAGAAGACGGCATAACGAGATCAAGGTACGTGACTGGAGTCCTCTCTATGGGCAGTCGGTGA  |
| p713          | CAAGCAGAAGACGGCATAACGAGATTCCTCATGTGACTGGAGTCCTCTCTATGGGCAGTCGGTGA   |
| p714          | CAAGCAGAAGACGGCATAACGAGATGTCAGTCAAGTGACTGGAGTCCTCTCTATGGGCAGTCGGTGA |
| p715          | CAAGCAGAAGACGGCATAACGAGATCGAATACCGTGACTGGAGTCCTCTCTATGGGCAGTCGGTGA  |
| p716          | CAAGCAGAAGACGGCATAACGAGATTCTAGGAGTGACTGGAGTCCTCTCTATGGGCAGTCGGTGA   |
| p717          | CAAGCAGAAGACGGCATAACGAGATCGCAACTAGTGACTGGAGTCCTCTCTATGGGCAGTCGGTGA  |
| p718          | CAAGCAGAAGACGGCATAACGAGATCGTATCTCGTGACTGGAGTCCTCTCTATGGGCAGTCGGTGA  |
| p719          | CAAGCAGAAGACGGCATAACGAGATGTACACCTGTGACTGGAGTCCTCTCTATGGGCAGTCGGTGA  |
| p720          | CAAGCAGAAGACGGCATAACGAGATCGGCATTAAGTGACTGGAGTCCTCTCTATGGGCAGTCGGTGA |
| p721          | CAAGCAGAAGACGGCATAACGAGATTCGTCTGAGTGACTGGAGTCCTCTCTATGGGCAGTCGGTGA  |
| p722          | CAAGCAGAAGACGGCATAACGAGATAGCCTATCGTGACTGGAGTCCTCTCTATGGGCAGTCGGTGA  |
| p723          | CAAGCAGAAGACGGCATAACGAGATCTGTACCAAGTGACTGGAGTCCTCTCTATGGGCAGTCGGTGA |
| p724          | CAAGCAGAAGACGGCATAACGAGATAGACCTTGTGACTGGAGTCCTCTCTATGGGCAGTCGGTGA   |
| p725          | CAAGCAGAAGACGGCATAACGAGATAGGATAGCGTGACTGGAGTCCTCTCTATGGGCAGTCGGTGA  |
| p726          | CAAGCAGAAGACGGCATAACGAGATCCTTCCATGTGACTGGAGTCCTCTCTATGGGCAGTCGGTGA  |
| p727          | CAAGCAGAAGACGGCATAACGAGATGTCCTTGAAGTGACTGGAGTCCTCTCTATGGGCAGTCGGTGA |
| p728          | CAAGCAGAAGACGGCATAACGAGATTGCCTAACGTGACTGGAGTCCTCTCTATGGGCAGTCGGTGA  |
| p729          | CAAGCAGAAGACGGCATAACGAGATCACAGACTGTGACTGGAGTCCTCTCTATGGGCAGTCGGTGA  |
| p730          | CAAGCAGAAGACGGCATAACGAGATTTACGTGCGTGACTGGAGTCCTCTCTATGGGCAGTCGGTGA  |
| p731          | CAAGCAGAAGACGGCATAACGAGATCCAAGGTTGTGACTGGAGTCCTCTCTATGGGCAGTCGGTGA  |
| p732          | CAAGCAGAAGACGGCATAACGAGATCACGCAATGTGACTGGAGTCCTCTCTATGGGCAGTCGGTGA  |
| p733          | CAAGCAGAAGACGGCATAACGAGATTTCCAGGTGTGACTGGAGTCCTCTCTATGGGCAGTCGGTGA  |

p734

CAAGCAGAAGACGGCATAACGAGATTCATCTCCGTGACTGGAGTCCTCTCTATGGGCAGTCGGTGA

A01 AATGATACGGCGACCACCGAGATCTACACTAGATCGCNNWNNWNNACACTCTTCCCTACACGACGCTCTTCCGATCT  
A02 AATGATACGGCGACCACCGAGATCTACACCTCTCTATNNWNNWNNACACTCTTCCCTACACGACGCTCTTCCGATCT  
A03 AATGATACGGCGACCACCGAGATCTACACTATCCTCTNNWNNWNNACACTCTTCCCTACACGACGCTCTTCCGATCT  
A04 AATGATACGGCGACCACCGAGATCTACACAGAGTAGANNWNNWNNACACTCTTCCCTACACGACGCTCTTCCGATCT  
A05 AATGATACGGCGACCACCGAGATCTACACCTAAGGAGNNWNNWNNACACTCTTCCCTACACGACGCTCTTCCGATCT  
A06 AATGATACGGCGACCACCGAGATCTACACACTGCATANNWNNWNNACACTCTTCCCTACACGACGCTCTTCCGATCT  
A07 AATGATACGGCGACCACCGAGATCTACACAAGGAGTANNWNNWNNACACTCTTCCCTACACGACGCTCTTCCGATCT  
A08 AATGATACGGCGACCACCGAGATCTACACCTAAGCCTNNWNNWNNACACTCTTCCCTACACGACGCTCTTCCGATCT  
A09 AATGATACGGCGACCACCGAGATCTACACGACATTGTNNWNNWNNACACTCTTCCCTACACGACGCTCTTCCGATCT  
A10 AATGATACGGCGACCACCGAGATCTACACACTGATGGNNWNNWNNACACTCTTCCCTACACGACGCTCTTCCGATCT  
A11 AATGATACGGCGACCACCGAGATCTACACGTACCTAGNNWNNWNNACACTCTTCCCTACACGACGCTCTTCCGATCT  
A12 AATGATACGGCGACCACCGAGATCTACACAGAGCTANNWNNWNNACACTCTTCCCTACACGACGCTCTTCCGATCT  
A13 AATGATACGGCGACCACCGAGATCTACACCATAGTGANNWNNWNNACACTCTTCCCTACACGACGCTCTTCCGATCT  
A14 AATGATACGGCGACCACCGAGATCTACACTACCTAGTNNWNNWNNACACTCTTCCCTACACGACGCTCTTCCGATCT  
A15 AATGATACGGCGACCACCGAGATCTACACCGCGATATNNWNNWNNACACTCTTCCCTACACGACGCTCTTCCGATCT  
A16 AATGATACGGCGACCACCGAGATCTACACTGGATTGTNNWNNWNNACACTCTTCCCTACACGACGCTCTTCCGATCT
